1 **Evidence for prescribed NK cell Ly49 developmental pathways in mice**

2  
3 Alberto J. Millan\*<sup>†</sup>, Bryan A. Hom\*, Jeremy B. Libang\*, Suzanne Sindi<sup>†‡</sup> and Jennifer O.  
4 Manilay\*<sup>†§1</sup>

5 \*Department of Molecular and Cell Biology, <sup>†</sup>Department of Applied Mathematics and  
6 <sup>‡</sup>Quantitative and Systems Biology Graduate Group, University of California - Merced,  
7 School of Natural Sciences, 5200 North Lake Road, Merced, CA 95343

8  
9 Running title: Interdependencies of NK cell clusters within the iNK stage

10  
11 <sup>§</sup> Corresponding Author:  
12 Phone: 209-228-4175  
13 Fax: none  
14 Email: [jmanilay@ucmerced.edu](mailto:jmanilay@ucmerced.edu)  
15

---

<sup>1</sup> This work was supported by University of California (UC) Merced faculty research funding and UC graduate student fellowships (to A.J.M.).

16 **Abstract**

17 Previous studies of NK cell inhibitory Ly49 receptors suggested their expression is  
18 stochastic. However, relatively few studies have examined this stochasticity in  
19 conjunction with activating Ly49 receptors. We hypothesized that the expression of  
20 activating Ly49 receptors is not stochastic and is influenced by inhibitory Ly49 receptors.  
21 We analyzed NK cell “clusters” defined by combinatorial expression of activating (Ly49H,  
22 Ly49D) and inhibitory (Ly49I, Ly49G2) receptors in C57BL/6 mice. Using the product rule  
23 to evaluate the interdependencies of the Ly49 receptors, we found evidence for a tightly  
24 regulated expression at the immature NK cell stage, with the highest interdependencies  
25 between clusters that express at least one activating receptor. Further analysis  
26 demonstrated that certain NK clusters predominated at the immature (CD27+CD11b-),  
27 transitional (CD27+CD11b+) and mature (CD27-CD11b-) NK cell stages. Using parallel  
28 in vitro culture and in vivo transplantation of sorted NK clusters, we discovered non-  
29 random upregulation of Ly49 receptors, suggesting that prescribed pathways of NK  
30 cluster differentiation exist. Our data infer that upregulation of Ly49I is an important step  
31 in NK cell maturation. Ki-67 expression and cell counts confirmed that immature NK cells  
32 proliferate more than mature NK cells. We found that MHC-I is particularly important for  
33 regulation of Ly49D and Ly49G2, even though no known MHC-I ligand for these receptors  
34 is present in B6 mice. Our data indicate that the regulatory systems controlling the  
35 expression of both activating and inhibitory Ly49 receptors are non-stochastic and  
36 support the idea that NK cell clusters develop in a non-random process correlated to their  
37 maturation stage.

38  
39

## 40 Introduction

41

42 Natural killer (NK) cells are innate lymphocytes which function in immune cell  
43 surveillance by the recognition and elimination of cellular targets. Unlike their T and B  
44 lymphocyte counterparts, which acquire antigen-specific diversity through genetic  
45 recombination events, NK cells generate germline-encoded receptors that can recognize  
46 and lyse cellular targets by releasing perforin, granzymes, and secrete regulatory and  
47 proinflammatory cytokines. Activating and inhibitory Ly49 receptors employ NK cell  
48 signaling pathways, which dictate NK cell effector functions through cytoplasmic  
49 immunoreceptor tyrosine-based inhibitory motifs (ITIMs) and immunoreceptor tyrosine-  
50 based activating motifs (ITAM) (1-4). NK cell subsets are thought to utilize a “rheostat”  
51 process in which NK cell subsets are tuned quantitatively by self-MHC class I ligands  
52 corresponding to specific Ly49 inhibitory receptors, which in turn provides a diversity of  
53 responsiveness towards cellular targets (5, 6). Through this mechanism, NK cells  
54 distinguish healthy from unhealthy cells. However, what regulates the acquisition of  
55 specific NK cell Ly49 receptors during NK cell development and maturation is still an  
56 unanswered and complex question. In addition, how models derived from the biology of  
57 Ly49 inhibitory receptors pertain to the acquisition of Ly49 activating receptors is  
58 unresolved.

59 NK cell subsets that express single as well as overlapping Ly49 activating and  
60 inhibitory receptors exist, which may reflect the complexity required to ensure host  
61 immunity while maintaining self-tolerance (7). Expression of Ly49 receptors, encoded by  
62 the polymorphic and polygenic *Klra* genes located on mouse chromosome 6, is often  
63 described as stochastic (8, 9). However, Ly49 receptor acquisition may not be entirely  
64 stochastic, as it has been shown that inhibitory Ly49 receptors can be regulated by self-  
65 MHC class I (MHC-I) expression and controlled by the Ly49 bidirectional transcriptional  
66 regulation of Pro1 and Pro2 (10, 11). In contrast, activating Ly49 receptors lack a defined  
67 Pro1 region. Mathematical methods to test the interdependence of expression of  
68 individual Ly49 inhibitory receptors on the expression of other Ly49 members in MHC-I-  
69 deficient and MHC-I-sufficient (wild type) mice support that Ly49 inhibitory receptor  
70 expression may not be independently distributed and thus may not be entirely random (8,  
71 12-15). Previous studies provide support that Ly49H and Ly49D are distinctly influenced  
72 by co-expression with inhibitory receptor Ly49C (16) and non-stochastic (10, 17)  
73 regulation of the expression of Ly49 activating receptors.

74 In this study, we tested the hypothesis that expression of Ly49 activating receptors  
75 is not stochastic and is influenced by Ly49 inhibitory receptors. To test this hypothesis,  
76 we utilized a combination of statistical, in vitro and in vivo approaches. We provide  
77 evidence for a prescribed pathway of NK “cluster transitions” in vitro and in vivo, which  
78 suggest that Ly49 activating receptor acquisition is directed. Even though no known  
79 MHC-I ligand for Ly49G2, Ly49H and Ly49D is known in B6 mice, NK cell cluster  
80 distribution is altered in MHC-I deficient mice. Taken together, our data support the idea  
81 that NK cell clusters develop in a non-random manner and provide additional evidence  
82 that the regulatory system that controls the expression of both Ly49 activating and  
83 inhibitory receptors is non-stochastic. Our findings lead to an expanded model of NK cell  
84 receptor acquisition during NK development and maturation.

## 85 **Materials and Methods**

86

### 87 **Mice**

88 C57B6/J, B6.SJL-Ptprca Pepcb/BoyJ, and B6.129P2-B2mtm1Unc/J  $\beta$ -2 microglobulin  
89 knockout ( $\beta$ <sub>2m</sub><sup>-/-</sup> KO) mice were obtained from The Jackson Laboratory and bred at the  
90 University of California, Merced. Mice of both sexes between the ages of 10 and 28 weeks  
91 were used for each experiment. We observed no significant differences between mice of  
92 both sexes or different ages, except for one specific study on cell proliferation (please see  
93 Results). Mice were housed in specific pathogen-free cages with autoclaved feed. Mice  
94 were euthanized by carbon dioxide asphyxiation followed by cervical dislocation. All  
95 animal procedures were approved by the UC Merced Institutional Animal Care and Use  
96 Committee.

97

### 98 **Flow cytometry (FACS)**

99 Splenic cells were harvested, processed and stained for flow cytometric analysis (FACS)  
100 as described (18). Cells were stained with the following antibodies, purchased from  
101 eBioscience, Biolegend, Miltenyi Biotec, and BD Biosciences: PE/Cy5-CD3 (145-2C11),  
102 PE/Cy5-CD4 (RM4-5), PE/Cy5-CD8a (53-67), PE/Cy5-Gr1 (RB6-8C5), PE/Cy5-CD19  
103 (6D5), PE-CD27 (LG3A10), BV421-NK 1.1 (PK136), BV510-CD11b (M1/70), biotinylated  
104 or APC-Ly49D (4E5), APC-Cy7-Ly49G2 (4D11), FITC- or APC-Ly49H (3D10), APC-  
105 VID770-Ly49I (YLI-90), and APC-Ki67 (SolA15), CD45.1 (A20), CD45.2 (104). BUV395-  
106 streptavidin was used to develop biotinylated antibodies. Staining of all cells included a  
107 preincubation step with unconjugated anti-CD16/32 (clone 2.4G2 or clone 93) mAb to  
108 prevent nonspecific binding of mAbs to Fc $\gamma$ R. Extracellular staining was performed as  
109 described (18). Intracellular staining was performed using the True-Nuclear™  
110 Transcription Factor Buffer Set (BioLegend) per manufacturer's instructions. Single-color  
111 stains were used for setting compensations, and gates were determined by historical data  
112 in addition to fluorescent-minus-one control stains. Flow cytometric data were acquired  
113 on the BD LSR II flow analyzer or FACS Aria II flow sorter (Becton Dickinson). The  
114 experimental data were analyzed using FlowJo™ Software version 10.6.0 and 10.6.3  
115 (Becton, Dickinson and Company).

116

### 117 **Identification of NK cell Ly49 cluster heterogeneity**

118 NK cell clusters (C1-C16) were determined by t-stochastic neighbor embedding (tSNE)  
119 using FlowJo™ Software version 10.6.0 and analyzed with 3000 iterations, 50 perplexity,  
120 2800 learning rate (eta), and vantage point tree KNN algorithm (19, 20). The cluster  
121 frequencies were determined by manual gating on live, lineage-negative, NK1.1+ cells  
122 and further divided by gating on populations based on Ly49I, Ly49G2, Ly49H, and Ly49D  
123 expression (please see **Figure 1E**).

124

### 125 **Assessment of NK cell Ly49 receptor interdependencies by the product rule**

126 Ly49I, Ly49G2, Ly49H, and Ly49D receptors were assessed for independent expression  
127 by the product rule. The product rule predicts the frequencies of NK cells that express  
128 single or a combination of Ly49 receptors. Assuming a model of independent expression  
129 of Ly49 receptors, the frequencies of NK cells expressing individual Ly49 receptors were  
130 used to calculate expected frequencies for NK cells expressing zero, one and more

131 receptors (8, 14, 15). For example, the expected frequency for NK cells that co-express  
132 Ly49H and Ly49D, but do not express Ly49G2, equals the probability (P) of expressing  
133 Ly49H (e.g. frequency of NK cells expressing Ly49H) multiplied by the probability of  
134 expressing Ly49D, multiplied by the difference of 1 minus the probability of expressing  
135 Ly49G2 (to account for its exclusion), such that  $P(H,D) = P(H)*P(D)*(1-P(G2))$  (please  
136 see Figure 2A). We calculated the “product rule error” between the observed and  
137 predicted frequencies as the  $\log_2(\text{observed frequencies}/\text{predicted frequencies})$ . If the  
138 observed frequencies were greater than the predicted frequencies (product rule error >  
139 0), this indicated the model underestimated the observed frequencies. Alternatively, if the  
140 observed frequencies were less than predicted frequencies (product rule error < 0), this  
141 indicated the model overestimated the observed frequencies. If the error equaled zero,  
142 then we concluded that the expression of the pattern of receptors were independent. To  
143 calculate the total error, we summed the absolute value of the product rule errors amongst  
144 clusters.

145

#### 146 **In vitro NK cell cluster development assay**

147 Splenic NK cells from C57B6/J mice were harvested and processed to a single-cell  
148 suspension in media (RPMI1640 media supplemented with 10% FBS, 0.09 mM  
149 nonessential amino acids, 2 mM L-glutamine, 1 mM sodium pyruvate, 100 U/ml penicillin,  
150 100 mg of streptomycin, 0.025 mM beta-mercaptoethanol, and 0.01 M HEPES) and cell  
151 counts determined using a hemocytometer. Splenic cells were enriched for NK cells as  
152 described in the EasySep Positive Selection Kit (STEMCELL Technologies)  
153 manufacturer’s suggested protocol by selecting with an anti-“lineage” cocktail (anti-CD3,-  
154 CD4,-CD8,-CD19,-Gr1, and -Ter119). NK cell clusters were then sorted on the FACS Aria  
155 II by gating on propidium iodide (PI)-negative (live), “lineage”-negative and NK1.1-positive  
156 cells. 90-95% post-sort purity was achieved, as measured by FACS. Approximately  
157 20,000 cells per NK cell cluster were cultured in 96-flat bottom tissue culture plates with  
158 the addition of 100,000 lethally-irradiated (30.0 Gy) splenic feeder cells and recombinant-  
159 mouse (rm) IL-15 (75 ng/ml). NK cell cluster frequencies were quantified by FACS after  
160 4 days of culture.

161

#### 162 **In vivo NK cell cluster adoptive transfer assay**

163 B6.SJL mice were used as a source of donor splenic NK cells. Spleens were aseptically  
164 harvested and processed to a single-cell suspension. NK cells were enriched as  
165 described above, and then sorted for each of the 16 NK cell clusters. B6 recipient mice  
166 were sublethally irradiated (5.5 Gy) with a cesium irradiator four hours before receiving a  
167 range of 50,000 to 200,000 donor NK cluster cells by retroorbital intravenous injection.  
168 Donor-derived CD45.1+ NK cell cluster frequencies were analyzed by FACS four days  
169 after transfer.

#### 170 **Statistical analysis**

171 Student’s t-test with a two-tailed distribution and with two-sample equal variance  
172 (homoscedastic test) was used to determine differences in means between groups using  
173 GraphPad Prism software version 8.4.2. A p-value of 0.05 was considered to be  
174 statistically significant. Asterisks indicate statistically significant differences \*p < 0.05, \*\*p  
175 < 0.01, \*\*\*p < 0.001, \*\*\*\*p < 0.0001.

## 176 Results

### 177 178 Identification of NK cell phenotypic heterogeneity amongst the combination of 179 Ly49 receptors

180  
181 NK cells express diverse frequencies and combinations of Ly49 activating and  
182 inhibitory surface receptors, but few studies have examined the relationship between  
183 expression of the activating receptor repertoire to that of the inhibitory receptor repertoire,  
184 and whether the activating receptors are subject to similar stochasticity in expression as  
185 previously described for inhibitory receptors (8, 14). We decided to focus on inhibitory  
186 receptors Ly49I and Ly49G2 and activating receptors Ly49H and Ly49D on splenic NK  
187 cells in C57B6/J (B6) mice, which express MHC-I ligands H-2K<sup>b</sup> and H-2D<sup>b</sup>. Ly49I's  
188 inhibitory ligand is H-2K<sup>b</sup>, Ly49H binds to the m157 viral antigen, and Ly49G2 and  
189 Ly49D's known ligand is H-2D<sup>d</sup> (not expressed in B6 mice) (9). Previous work (10, 17) in  
190 which analyses of Ly49H and Ly49D were performed, provided a source of historical  
191 controls to which our data could be compared. Although other Ly49 family members exist,  
192 we were limited to these 4 receptors due to the availability of fluorochrome-conjugated  
193 specific antibodies and the number of fluorochromes available on our flow cytometers.  
194 Expression of each Ly49 receptor was observed (**Figure 1A-B**). We defined sixteen NK  
195 cell "clusters" (C) by the number and type of activating receptors and inhibitory receptors  
196 expressed. That is, Cluster 1 (C1) expresses both Ly49H and Ly49D activating receptors  
197 and neither Ly49I nor Ly49G2 inhibitory receptors, whereas Cluster 16 (C16) expresses  
198 both Ly49I and Ly49G2 inhibitory receptors but neither Ly49H nor Ly49D activating  
199 receptors (**Figure 1C**). By using these four receptors, sixteen possible combinations of  
200 Ly49 activating and inhibitory receptor expression were identified by t-distributed  
201 stochastic neighbor embedding (t-SNE) analysis of flow cytometric data (**Figure 1F**), and  
202 further examination of the expression of individual Ly49 receptors allowed us to confirm  
203 each cluster phenotype (**Figure 1D**) (19). Furthermore, we developed an NK cell cluster  
204 gating strategy that identified the sixteen unique subpopulations (clusters) and their  
205 frequencies (**Figure 1E**). Similar to previous studies which analyzed inhibitory Ly49  
206 receptors only (8, 14), we observed Cluster 8 (C8), which expresses none of the four  
207 receptors, to be one of the most prevalent populations (**Figure 1G**). By analyzing Ly49  
208 activating receptor frequency, we observed that clusters co-expressing Ly49H and Ly49D  
209 activating receptors were most represented, i.e. C1 (I-G2-H+D+), C4 (I-G2+H+D+), C5  
210 (I+G2-H+D+), and C9 (I+G2+H+D+) (**Figure 1G**). Conversely, frequencies were lowest  
211 for clusters that express both Ly49 inhibitory receptors, such as C16 (I+G2+H-D-), C13  
212 (I+G2+H-D+), and C12 (I+G2+H+D-) (**Figure 1G**). These data suggest a possible  
213 selective (non-random) pressure controlling the frequencies of these clusters in mice.

### 214 215 High interdependencies of NK cell cluster frequencies within the immature NK 216 stage

217  
218 Next, to explore the possibility of independent (random) expression of our Ly49  
219 receptors of interest, we utilized the product rule model for independent expression  
220 assuming the stochastic nature of Ly49 receptors. The model states that if Ly49I, Ly49G2,  
221 Ly49H, and Ly49D expression is independent of one another, then the observed

222 frequencies of NK cells that express zero, one, two or more receptors can be predicted  
223 by the measurement of individual Ly49 receptor frequencies (8, 15) (**Figure 2A**). Thus, if  
224 the predicted frequencies match the observed biological frequencies, then we conclude  
225 no interdependencies between expression of those Ly49 receptors. Alternatively, if the  
226 observed frequencies do not match the predicted frequencies, the expression of these  
227 receptors are interdependent (non-random) for reasons including, but not limited to, linked  
228 receptor expression, gene regulation, and biased receptor selection (8, 10, 21). Our  
229 comparison of the observed versus predicted NK cluster frequencies demonstrate  
230 independent expression in some clusters (C1, C5, C6, C9, C11, C12, C15 and C16), but  
231 dependencies in others (C2, C3, C4, C7, C8, C10, C13 and C14) (**Figure 2B**). We next  
232 calculated the product rule error (e.g.  $\log_2(\text{observed}/\text{predicted})$ ) for each cluster to identify  
233 if the model underestimated (observed > predicted), overestimated (observed <  
234 predicted), or matched the observed frequencies (observed = predicted). An example of  
235 the product rule errors in clusters arranged by their patterns of Ly49H and Ly49D  
236 expression is shown in **Figure 2C**. We show that NK clusters C14, C8 (which are H-D-),  
237 and C4 (H+D+) frequencies were underestimated by the model, whereas clusters C10,  
238 C3 (both H+D-) and, C7, C13, and C2 (H-D+), were overestimated by the model (**Figure**  
239 **2C**). We noted that the product rule underestimated the frequencies of five out of the eight  
240 clusters that express only one of the Ly49 activating receptors (C10, C3, C7, C13, and  
241 C2). These data suggest interdependencies between Ly49H and Ly49D expression.

242 We hypothesized that a source of NK cell Ly49 expression dependencies was the  
243 stage of maturation. To test our hypothesis, we utilized the NK cell maturation markers  
244 CD27 and CD11b to examine the frequencies of each cluster amongst immature NK (iNK;  
245 CD27<sup>+</sup>CD11b<sup>-</sup>), transitional NK (tNK; CD27<sup>+</sup>CD11b<sup>+</sup>), and mature NK (mNK; CD27<sup>-</sup>  
246 CD11b<sup>+</sup>) cells (1, 18, 22, 23) (**Figure 2D**). We calculated the total error by summing the  
247 absolute values of the product rule errors for each NK cell maturation stage (**Figures 2E,**  
248 **2H-J**). The total error was significantly higher at the iNK cell stage relative to the tNK and  
249 mNK cell stages, suggesting more Ly49 receptor dependencies at the iNK stage (**Figure**  
250 **2E**). iNK total error was significantly higher in clusters which at least one activating  
251 receptor (**Figure 2F**). Examination of the inhibitory receptors showed very similar patterns  
252 (**Figure 2G**). The exceptions were H-D- clusters which displayed similar error between  
253 iNK, tNK, and mNKs, and I-G2+ clusters, in which error was high in the iNK and mNK  
254 cells (**Figure 2F-G**). Moreover, C8, C14, C15, and C16, all of which are H-D-, showed  
255 more independent expression (lower total error) in the iNK ( $1.99 \pm 0.21$ ) and tNK ( $2.20 \pm$   
256  $0.18$ ) cells relative to I-G2- clusters C1, C2, C3, C8 in the iNK ( $5.48 \pm 0.45$ ) and tNK ( $3.1$   
257  $\pm 0.10$ ) cells (**Figure 2F-G**). No difference between the total error for tNK and mNK cells  
258 within the H-D- and I-G2- groups were observed (**Figure 2F-G**). Additionally, we observed  
259 the majority of clusters were either overestimated or underestimated consistently  
260 throughout NK cell maturation (**Figure 2H-J**). There were some exceptions: C14 (I+G2-  
261 H-D-) was overestimated by the model at the iNK stage and then underestimated at the  
262 tNK and mNK maturation stage, and C6 (I-G2+H-D+) was overestimated at the iNK stage  
263 and then slightly underestimated at the mNK cell stage (**Figure 2H-J**). Taken together,  
264 the product rule model provided evidence for a tightly regulated expression system for  
265 Ly49 receptors especially at the iNK maturation stage, with the highest interdependencies  
266 in clusters that express at least one Ly49H and Ly49D activating receptor.

267

## 268 **Dominant expression of Ly49I in all clusters at the mature NK cell stage**

269  
270 Further analysis revealed Ly49 cluster frequencies were unique at each NK cell  
271 maturation stage (**Figure 3A-D**). We identified Ly49I receptor expression frequency to  
272 significantly increase from iNK to tNK to mNK stages (**Figure 3E**). Ly49G2, Ly49H, and  
273 Ly49D frequencies significantly increased between iNK to tNK stages, and then  
274 decreased (Ly49G2 and Ly49D) or stabilized (Ly49H) moving from the tNK to mNK  
275 stages (**Figure 3E**). The frequencies of clusters with zero or one receptor were found to  
276 decrease; conversely, clusters expressing two, three, or four receptors increased from  
277 iNK to tNK stages (**Figure 3F**).

278 To determine if specific clusters were predominantly grouped at the iNK, tNK or  
279 mNK cell stages of maturation, we quantified the cluster frequencies at each NK  
280 maturation stage and visualized the similarities between clusters with principal  
281 component analysis (PCA) (24). NK cell cluster percentages were quantified by  
282 normalizing each cluster frequency relative to each NK maturation stage, such that a  
283 cluster's frequency was divided by the sum of that cluster's frequencies found at each  
284 maturation stage and then multiplied by 100 (**Supplemental Figure 1**). We computed the  
285 PCA from the average normalized frequencies of clusters at each NK stage and  
286 determined similarities between clusters with respect to NK maturation (**Figure 3G-J**).  
287 We grouped clusters found predominantly at the iNK, tNK, and mNK cell stage in our  
288 PCA, which were confirmed by observing the plotted percentages (**Figure 3H-J**). That  
289 is, we identified C8, C15, C3, and C10 to predominate the iNK cell stage (**Figure 3H**), C1,  
290 C2, C4, C6 to predominate at the tNK cell stage (**Figure 3I**), and C9, C5, C13, C16, C7,  
291 C11, C14 to predominate at the mNK cell stage (**Figure 3J**). C10, C1 and C2 assembled  
292 close together in the PCA, but we decided to group C10 into the "iNK-predominant" group  
293 because the changes in the % of C10 at the iNK, tNK and mNK were more similar to to  
294 C8, C3 and C15 (**Supplemental Figure 1**). Notably, the predominant clusters within each  
295 stage were represented at different proportions as maturation progressed. For example,  
296 C8, which expresses none of the four receptors, decreased in a sequential manner  
297 throughout NK cell maturation from  $80.7\% \pm 1.8$  in the iNK stage to  $6.6\% \pm 1.5$  at the  
298 mNK cell stage (**Figures 3H and 3J**). In contrast, tNK-predominant clusters were lower  
299 at the iNK and mNK stages, and mNK predominant clusters were lowest at the iNK and  
300 tNK stages (**Figures 3H, 3I, 3J**). Furthermore, all mNK-predominant clusters expressed  
301 the inhibitory self-Ly49I receptor, but iNK- and tNK-predominant clusters did not (**Figures**  
302 **1C, 3H, 3I and 3J**) Thus, these findings suggest that the frequency and phenotype of the  
303 NK cell clusters are regulated throughout NK cell maturation to increase the types of  
304 receptors expressed, and positively select for self-Ly49I at the mNK cell stage.

## 305 **Evidence for prescribed NK cell Ly49 developmental pathways in mice**

306  
307 The observed distribution of clusters within the iNK, tNK and mNK stages (**Figure**  
308 **3 and Supplemental Figure 1**) led us to hypothesize that the iNK-predominant clusters  
309 may be precursors to clusters that predominate at the tNK to mNK stages. To test this,  
310 we sorted each of the 16 NK cell clusters and cultured them with 75 ng/ml recombinant-  
311 mouse-interleukin-15 (rmIL-15) and lethally irradiated splenic feeder cells for 4 days  
312 (**Figure 4A**). We observed that iNK-predominant clusters C8, C15, C3, C10, and tNK-



313 predominant clusters C1, C2, C4, C6, all upregulated Ly49I receptor after culture (**Figure**  
314 **4B, 4C and 4D**), which would re-categorize them into clusters found predominantly in the  
315 mNK cell stage (C5, C7, C9 and C13, respectively, **Figures 1C and 3J**). Cultures initiated  
316 with mNK-predominant clusters maintained their Ly49 receptor phenotypes (data not  
317 shown). To verify our findings in vivo, we adoptively transferred sorted C8, C15, C3, C10,  
318 C1, C2, and C14 cells from B6.SJL (CD45.1+) mice into sublethally irradiated B6  
319 (CD45.2+) hosts and analyzed their differentiation after 4 days (**Figure 4E**). Similar to our  
320 in vitro results, we observed C8, C15, C3, C10, C1, and C2 to upregulate Ly49I (**Figure**  
321 **4F-I**), and that Ly49H and Ly49D maintained stable expression (data not shown).  
322 However, in vivo, C8, C1, C2 upregulated a small frequency of inhibitory Ly49G2 receptor  
323 after 4 days (**Figure 4F and 4G**). Ly49 receptor expression on C14, a mNK-predominant  
324 cluster, was unchanged after adoptive transfer (**Figure 4H**). Altogether, these results  
325 strongly support the existence of prescribed pathways of NK cell maturation from  
326 precursor NK cell clusters, and that Ly49I upregulation is a key step for mature NK cells  
327 (**Figure 4J and 4K**).

### 328 **Immature NK cells display similar proliferation characteristics, regardless of** 329 **cluster type**

330  
331 Given our discovery of prescribed pathways of NK cluster development, we further  
332 analyzed the clusters for differences in their proliferative state. We hypothesized that the  
333 proliferation rates of specific NK cell clusters would be distinct. Furthermore, we expected  
334 proliferation rates to correlate with maturation stage. To test our hypotheses, we sorted  
335 and cultured bulk iNKs, tNKs, and mNKs (**Figure 5A**) on lethally irradiated splenic feeder  
336 cells in media containing 75 ng/ml of rm-IL-15, and measured cellularity at Day 2 and Day  
337 6 post-culture. We observed the highest fold change in cellularity for cultures initiated with  
338 iNK cells, as compared to cultures initiated with tNK or mNK cells (**Figure 5B**). We  
339 disaggregated the fold changes in proliferation between iNK-predominant (C8, C15, C3,  
340 C10), tNK-predominant (C1, C2, C4, C6), and mNK-predominant (C9, C5, C16, C12, C13,  
341 C14, C11, C7) clusters within each sorted population (**Figure 5C, 5D, 5E**). Our data show  
342 that iNK-initiated cultures increased the fold change in cellularity of tNK-predominant  
343 clusters relative to iNK- and mNK-predominant clusters (**Figure 5C**). In contrast, mNK-  
344 initiated cultures showed reduced proliferation in tNK predominant clusters relative to iNK-  
345 and mNK-predominant clusters (**Figure 5E**). Additionally, the frequency of C8, which  
346 expresses none of the four Ly49 receptors and is the most prevalent in the iNK stage,  
347 dramatically decreased during the culture period (**Figure 5F**), which is consistent with our  
348 observation of decreased frequency of C8 at the tNK and mNK stages in vivo (**Figure 3I**  
349 **and 3J**).

350 To confirm these proliferation patterns, we stained NK cells for Ki-67 expression  
351 post-culture. After culture, we noticed that CD11b expression was downregulated  
352 universally on NK cells, preventing us from using CD11b to distinguish iNK, tNK and  
353 mNKs (data not shown), likely as an artifact of in vitro culture (25). However, CD27  
354 expression was still binary, allowing us to distinguish CD27+ (presumably iNK and tNKs)  
355 from CD27- mNKs. We found that NK1.1<sup>+</sup>CD27<sup>+</sup> cells expressed higher Ki-67 levels  
356 compared to NK1.1<sup>+</sup>CD27<sup>-</sup> cells (**Figure 5G and 5H**), regardless of Ly49 receptor  
357 expression (**Figure 5I**). This pattern persisted when the Ki-67 expression was examined

358 in specific NK cell clusters, with the exception of cluster C15 (which only expresses  
359 Ly49G2) (**Figure 5J**). These data show that cluster designation (and hence Ly49 receptor  
360 expression) does not dictate NK cell proliferation. Rather, proliferative potential is a  
361 general characteristic of NK cell maturation stage, with highest proliferation in the iNK  
362 cells and lowest proliferation in mNK cells.

363  
364 **MHC-I-deficiency does not affect NK cell maturation, but results in**  
365 **underrepresentation of NK cell clusters which express activating Ly49 receptors**  
366

367 We next investigated the effects of MHC-I on NK cell cluster heterogeneity and NK  
368 cell maturation in  $\beta_2m^{-/-}$  (MHC-I<sup>-/-</sup>) mice. In MHC-I<sup>-/-</sup> spleens, the frequencies of NK cells  
369 expressing inhibitory Ly49I and Ly49G2 receptors increased, whereas the frequencies of  
370 NK cells expressing activating Ly49H and Ly49D receptors decreased (**Figure 6A**).  
371 These differences in Ly49 frequencies in MHC-I<sup>-/-</sup> mice did not appear to influence NK cell  
372 maturation (**Figure 6B**). MHC-I<sup>-/-</sup> mice displayed significantly lower frequencies of I-G2-  
373 NK cells (**Figure 6C and 6D**) and higher frequencies of H-D- NK cells (**Figure 6E and**  
374 **6F**). Thus, NK cells from MHC-I<sup>-/-</sup> mice have decreased frequencies of activating  
375 receptors and increased frequencies of inhibitory receptors. The increased frequency of  
376 inhibitory receptor expressing NK cells is due to an increase in dual inhibitory receptor  
377 expressing I<sup>+</sup>G2<sup>+</sup> NK cells, as lower frequencies of I-G2<sup>+</sup> NK cells were observed in MHC-  
378 I<sup>-/-</sup> mice (**Figure 6C-D**). Additionally, our activating receptor analysis showed that H+D-  
379 NK cells increased, whereas H+D+ cell frequencies decreased in MHC-I<sup>-/-</sup> mice (**Figure**  
380 **6E-F**). Further investigation of individual Ly49 receptor frequencies as a function of iNK,  
381 tNK and mNK maturation stages revealed different behaviors of the inhibitory and  
382 activating Ly49 receptor behaviors in MHC-I<sup>-/-</sup> mice (**Figure 6G and 6H**). The frequencies  
383 of Ly49I<sup>+</sup> and Ly49G2<sup>+</sup> NK cells were significantly higher in MHC-I<sup>-/-</sup> mice compared to  
384 MHC-I<sup>+/+</sup> (wild-type) controls at each stage of NK maturation (**Figure 6G**). In contrast, the  
385 frequencies of Ly49H<sup>+</sup> and Ly49D<sup>+</sup> NK cells were significantly decreased only at the tNK  
386 and mNK stages, but similar at the iNK stage (**Figure 6H**). Overall, these data suggest  
387 MHC-I molecules play a differential role in the expression of inhibitory and activating Ly49  
388 receptors, and that MHC-I is not essential for progression from iNK, tNK, and mNK stages  
389 during maturation.

390 We next compared NK cell cluster Ly49 receptor expression dependencies  
391 amongst WT and MHC-I<sup>-/-</sup> mice using the product rule. Any deviations between the two  
392 conditions (WT and MHC-I<sup>-/-</sup>) would indicate dependencies which are influenced by MHC-  
393 I expression. We compared the product rule errors for each cluster in WT and MHC-I<sup>-/-</sup>  
394 mice, and observed significantly different errors in nine of the sixteen clusters in MHC-I<sup>-/-</sup>  
395 mice (**Figure 6I**). C1, C2, C5, C6, and C9 were found to increased error (e.g. more  
396 dependencies) in MHC-I<sup>-/-</sup> mice, and these clusters commonly express the activating  
397 Ly49D receptor (**Figure 6I**). In contrast, C10 (I-G2+H+D-), C12 (I+G2+H+D-), and C14  
398 (I+G2-H-D-) in MHC-I<sup>-/-</sup> mice decreased dependencies (error) relative to WT, and do not  
399 express Ly49D. Furthermore, C15 (I-G2+H-D-) was the only cluster that flipped  
400 directionality of the error from being overestimated in WT to underestimated in MHC-I<sup>-/-</sup>  
401 mice. This suggest that Ly49G2 is negatively regulated in MHC-I sufficient  
402 microenvironments.

403           Next, we wanted to determine MHC-I's influence on NK cell cluster distributions.  
404           First, we examined NK cell frequencies based on the number of Ly49 receptors  
405           expressed, regardless of receptor type. Collectively, clusters that expressed only one  
406           receptor were increased at the iNK cell stage (**Supplemental Figure 2A**), but this  
407           increase was attributed to an increase in C15 only (**Figure 6J**). The frequencies of  
408           clusters which express two receptors were collectively lower at all stages of NK cell  
409           maturation in MHC-I<sup>-/-</sup> mice (**Supplemental Figure 2B**), which was attributed to  
410           decreases in C1, C6, C7, and C11 clusters. C10 and C16, which also expressed 2  
411           receptors, were increased in MHC-I<sup>-/-</sup> mice (**Figure 6J**). The overall increase in NK cells  
412           that express 3 receptors in MHC-I<sup>-/-</sup> mice was attributed to C12 (**Supplemental Figure**  
413           **2C, Figure 6J**). All of the clusters that were increased (C15, C10, C16, and C12) express  
414           Ly49G2 (**Figure 6J**). Furthermore, C3, C1, C2, C5, C7, and C11, which lack Ly49G2  
415           expression, were significantly decreased in NK cell frequencies (**Figure 6J**). These data  
416           suggest that MHC-I is a major regulator of Ly49G2 expression, despite the fact that no  
417           known MHC-I ligand for Ly49G2 in B6 mice has been described (3). In addition, Ly49G2-  
418           positive clusters C15, C10, C16, and C12 all lack Ly49D expression and were increased.  
419           In contrast, the Ly49G2-negative clusters C1, C2, C5, and C7, which express Ly49D,  
420           were decreased (**Figure 6J**). This suggests that there is a reciprocal dependency  
421           between Ly49D and Ly49G2 expression and MHC-I in the distribution of cluster  
422           frequencies. No common relationship between MHC-I deficiency and Ly49I or Ly49H on  
423           cluster distributions could be determined with our cluster frequency data set (**Figure 6J**).

424           We continued to investigate the influence of MHC-I on NK cell cluster frequencies  
425           found predominantly within the iNK, tNK, and mNK cell stage of maturation. Similar to the  
426           previous analysis in which we determined the predominant clusters within NK maturation  
427           stages (**Figure 3**), we compared MHC-I<sup>-/-</sup> and WT (MHC-I<sup>+/+</sup>) clusters using PCA. We  
428           observed that most clusters in MHC-I<sup>-/-</sup> matched the same trends in cluster maturation  
429           found in WT mice (**Supplemental Figure 2D**); however, C1, C2, and C16 maintained  
430           steady frequencies throughout maturation in MHC-I<sup>-/-</sup> mice (**Supplemental Figure 2F**  
431           **and 2G**). In WT mice, C15, C10, and C3 iNK-predominant clusters transition into C16,  
432           C12, and C11 (**Figure 4**). In MHC-I<sup>-/-</sup> mice, we observed increased C15 and C10  
433           frequencies, matching the observed frequencies for C16 and C12. Furthermore, we  
434           observed decreased C3 and C11 frequencies (**Supplemental Figure 2E and 2G**).  
435           Additionally, tNK-predominant clusters C2 and C1 were both decreased in MHC-I<sup>-/-</sup> mice  
436           and their subsequent mNK clusters C7 and C5 were also both decreased (**Figure 6J**).  
437           Although tNK C4 was decreased, its subsequent cluster, C9, was found in normal  
438           frequencies at the mNK stage. C6 to C13 frequencies were also unaffected. Notably, C4,  
439           C9, C6 and C13 all co-express Ly49G2 and Ly49D. Overall, these data lend further  
440           support to the prescribed pathways of NK cluster differentiation and suggest that MHC-I  
441           influences the cluster frequencies via regulation of Ly49G2 and Ly49D expression.

442

## 443 Discussion

444

445 Previously, the product rule has been used to determine the interdependencies of  
446 inhibitory Ly49 receptors and their respective MHC-I ligand (8, 15). In this study, we  
447 extended this analysis to include the Ly49I inhibitory receptor in combination with  
448 activating receptors Ly49H and Ly49D, as well as a careful study of Ly49 receptor  
449 “clusters” based on NK cell maturation. Here, we show for the first time that the majority  
450 of the interdependencies in Ly49 receptor expression originate at the iNK cell maturation  
451 stage (8, 14), and that specific clusters predominate at each stage. Our results  
452 demonstrate strong interdependencies of the activating Ly49H and Ly49D receptors,  
453 which we propose can explain the altered cluster frequencies observed in MHC-I<sup>-/-</sup> mice.  
454 Moreover, our results further resolve a role for Ly49I as an important selective marker of  
455 completion of NK cell development in B6 mice (22).

456 Ly49I's known ligand in B6 mice is MHC-I K<sup>b</sup> (3, 9, 26). Our NK cluster  
457 development studies suggest a process in which Ly49I-negative iNK and tNK clusters  
458 develop with high proliferative potential. We propose that when Ly49I is upregulated,  
459 transition into the mNK cell stage occurs, and proliferation is then inhibited by interactions  
460 between Ly49I and K<sup>b</sup>. These observations are most consistent with the “sequential  
461 expression model”, which proposes splenic NK cells sequentially accumulate inhibitory  
462 Ly49 receptors until receptors specific for self MHC-I molecules are expressed (14, 27,  
463 28). We observed that Ly49I+ clusters become more prevalent overall at the mNK cell  
464 stage, indicating that NK cells also sequentially accumulate activating and non-self-  
465 binding Ly49 receptors before expressing Ly49I. Consistent with previous findings, we  
466 observed decreased mNK cell proliferation relative to iNK and tNK cells (2), which may  
467 suggest that self-inhibitory Ly49I completes the maturation process and maintains mNK  
468 cells in a quiescent state ready to be triggered in an immune response.

469 Our data expand the sequential expression model and suggest an updated  
470 working model in which MHC-I affects NK cell Ly49 activating and inhibitory receptor  
471 expression and alters the prescribed pathways of NK cluster differentiation, but via distinct  
472 mechanisms. Our model distinguishes between the differentiation of clusters expressing  
473 only inhibitory (**Figure 6L-M**), or only activating receptors at an early maturation stage  
474 (**Figure 6N-6O**). In this working model, we focus on the Ly49 receptor interactions at the  
475 iNK and tNK stages of maturation that result in upregulation of Ly49I to complete NK cell  
476 maturation. In **Figure 6L**, in the predominant iNK cluster that expresses inhibitory Ly49G2  
477 but no activating receptors (C15), Ly49G2 inhibitory signals are not initiated (because  
478 there is no Ly49G2 ligand in B6 mice). Due to this lack of inhibitory signal, developing NK  
479 cells then upregulate inhibitory receptor Ly49I (differentiating to C16). Ly49I binds to its  
480 H-2K<sup>b</sup> ligand, and in turn, C16 NK cell development is completed and then sustained  
481 (**Figure 6L**). The increased frequencies of C15 and C16 observed in MHC-I<sup>-/-</sup> mice  
482 (**Figure 6I**) can be explained by this model (**Figure 6M**). In MHC-I<sup>-/-</sup> mice, the C15 cluster  
483 upregulates Ly49I in the same fashion as in WT mice. However, Ly49I inhibitory signals  
484 are not generated (because H-2K<sup>b</sup> is not present) and the developing C15 cluster  
485 continues to expand (**Figure 6M**). Extending this working model to clusters that co-  
486 express a single activating Ly49 receptor with Ly49G2 suggests that Ly49H and Ly49D  
487 regulate cluster frequencies differently, as C10 (G2+H+D-I-) and its mature counterpart  
488 C12 (G2+H+D-I+) are both increased in MHC-I<sup>-/-</sup> mice, whereas frequencies of C6

489 (G2+D+H-I-) and its counterpart C13 (G2+D+H-I+) are unaffected. This suggests that the  
490 Ly49H+ clusters are controlled by presence of MHC-I. However, C4, which expresses  
491 both activating receptors (G2+H+D+I-), was lower in frequency in MHC-I<sup>-/-</sup> mice, but  
492 frequencies of its counterpart C9 (G2+H+D+I+) were normal. This indicates that the roles  
493 of Ly49H and Ly49D during NK cell development are complex, and MHC-I is not essential  
494 for some of these roles.

495 Our accompanying working model of NK cell development starting with clusters  
496 expressing only activating receptors at the iNK and tNK stages is shown in **Figure 6N**.  
497 The known ligand for Ly49H is m157, a mouse cytomegalovirus MHC-like protein (2, 29),  
498 while the known ligand for Ly49D is H-2D<sup>d</sup>. No known self-MHC-I ligand has been  
499 identified for Ly49H and Ly49D in B6 mice (30), but it is possible weak binding to self-  
500 MHC-I or non-MHC-I ligands exist (31, 32). Freund et al. reported that activation signals  
501 via SLP-76 upregulates inhibitory Ly49A, Ly49G2, and Ly49I receptor expression (10).  
502 Similarly, we presume that in B6 mice, an activating ligand exists for Ly49H and Ly49D.  
503 NK clusters with one activating receptor (e.g. C2, C3) will generate a signal in response  
504 to this activating ligand, which promotes its differentiation and expansion. The activating  
505 signal also results in upregulation of inhibitory Ly49I at the mNK stage (**Figure 6N**). We  
506 interpret the clear effects of MHC-I deficiency on Ly49H and Ly49D frequencies to  
507 demonstrate a relationship between MHC-I and the activating receptors, but that this is  
508 not a direct ligand-receptor interaction. NK cell development and NK cell survival in MHC-  
509 I-deficient mice may be impaired by dysfunctional dendritic cell expression of IL-12 and  
510 IL-15 transpresentation (33, 34). In MHC-I<sup>-/-</sup> mice, we assume the activating ligand is  
511 absent or signaling is impaired. In the absence of these signals, low expansion and  
512 impaired differentiation to the corresponding mNK cluster in MHC-I<sup>-/-</sup> mice results. Lack  
513 of activating signals in MHC-I<sup>-/-</sup> also dysregulates the expression of Ly49I at the mNK  
514 stage (**Figure 6O**). We observed an enhanced decrease in cluster frequencies in MHC-I<sup>-/-</sup>  
515 mice when two activating receptors were expressed (C1 and C5), which we posit could  
516 result from lower expansion of dual H+D+ clusters (**Figure 6I**). However, C9, which is  
517 H+D+ and also co-expresses both inhibitory receptors, is unaffected in the MHC-I<sup>-/-</sup>,  
518 suggesting a “canceling out” or “balancing” of activating and inhibitory signals in this case.  
519 This balancing is further supported by the similar frequencies of C6 and its mNK  
520 counterpart C13, which express one inhibitory and activating receptor, in B6 and MHC-I<sup>-/-</sup>  
521 mice (**Figure 6I**).

522 In our study, we focused on the role of Ly49 receptors on NK cell development.  
523 However, given that NK cytotoxicity is governed by balance of signals between Ly49  
524 activating and inhibitory receptors (**3**), it is also possible that our evidence of prescribed  
525 NK cell developmental pathways can be applied to the identification of NK cell clusters  
526 with high cytotoxic potential. Transcription of cytotoxicity genes increases with NK  
527 maturation with the highest cytotoxic gene expression at the mNK stage (22, 23). NK cell  
528 licensing via the expression of Ly49I and its binding to K<sup>b</sup> is consistent with our  
529 observations that mNK cells acquire Ly49I expression in a manner that correlates to NK  
530 cell maturation.

531 Although we have focused on splenic NK cells in our work, it is also noteworthy  
532 that mice and human NK cell maturation are could be tissue-specific, which may change  
533 the NK cell Ly49 cluster pathways we observed in the spleen (22, 35). Although NK cells  
534 originate in the bone marrow, they continue to mature in peripheral tissues. However,

535 these tissues have been shown to express different frequencies of iNK, tNK, and mNK  
536 cells (22, 36). The bone marrow and lymph node tend to express high frequencies of iNK  
537 and tNK cells, whereas the lung compartment expresses mostly mNK cells. The spleen,  
538 liver and blood tend to express all three stages of NK cell maturation (22). Additional  
539 studies are necessary to determine if the prescribed pathways of NK development we  
540 observed in the spleen are conserved in other tissues.

541 **Acknowledgments**

542

543 We thank the staff of the Department of Animal Research Services and the Flow  
544 Cytometry Core of the Stem Cell Instrumentation Foundry at the University of California  
545 Merced for excellent animal care and technical support. We thank Dr. Kirk Jensen with  
546 the gift of rm-IL-15 and Dr. Anna Beaudin for sharing flow cytometry reagents. We are  
547 also grateful to Drs. Marcos E. García-Ojeda and Katrina K. Hoyer, as well as the UC  
548 Merced Immunology Journal Club for their comments on the manuscript.

549

550

## 551 References

- 552
- 553 1. Chiossone, L., J. Chaix, N. Fuseri, C. Roth, E. Vivier, and T. Walzer. 2009.  
554 Maturation of mouse NK cells is a 4-stage developmental program. *Blood* 113:  
555 5488-5496.
  - 556 2. Nabekura, T., and L. L. Lanier. 2016. Activating Receptors for Self-MHC Class I  
557 Enhance Effector Functions and Memory Differentiation of NK Cells during  
558 Mouse Cytomegalovirus Infection. *Immunity* 45: 74-82.
  - 559 3. Meza Guzman, L. G., N. Keating, and S. E. Nicholson. 2020. Natural Killer Cells:  
560 Tumor Surveillance and Signaling. *Cancers (Basel)* 12.
  - 561 4. Lanier, L. L. 2003. Natural killer cell receptor signaling. *Current Opinion in*  
562 *Immunology* 15: 308-314.
  - 563 5. He, Y., and Z. Tian. 2017. NK cell education via nonclassical MHC and non-MHC  
564 ligands. *Cell Mol Immunol* 14: 321-330.
  - 565 6. Joncker, N. T., N. C. Fernandez, E. Treiner, E. Vivier, and D. H. Raulet. 2009.  
566 NK cell responsiveness is tuned commensurate with the number of inhibitory  
567 receptors for self-MHC class I: the rheostat model. *J Immunol* 182: 4572-4580.
  - 568 7. Jaeger, B. N., and E. Vivier. 2012. Natural killer cell tolerance: control by self or  
569 self-control? *Cold Spring Harb Perspect Biol* 4.
  - 570 8. Sternberg-Simon, M., P. Brodin, Y. Pickman, B. Onfelt, K. Karre, K. J. Malmberg,  
571 P. Hoglund, and R. Mehr. 2013. Natural killer cell inhibitory receptor expression  
572 in humans and mice: a closer look. *Front Immunol* 4: 65.
  - 573 9. Schenkel, A. R., L. C. Kingry, and R. A. Slayden. 2013. The ly49 gene family. A  
574 brief guide to the nomenclature, genetics, and role in intracellular infection. *Front*  
575 *Immunol* 4: 90.
  - 576 10. Freund, J., R. M. May, E. Yang, H. Li, M. McCullen, B. Zhang, T. Lenvik, F.  
577 Cichocki, S. K. Anderson, and T. Kambayashi. 2016. Activating Receptor Signals  
578 Drive Receptor Diversity in Developing Natural Killer Cells. *PLoS Biol* 14:  
579 e1002526.
  - 580 11. McCullen, M. V., H. Li, M. Cam, S. K. Sen, D. W. McVicar, and S. K. Anderson.  
581 2016. Analysis of Ly49 gene transcripts in mature NK cells supports a role for the  
582 Pro1 element in gene activation, not gene expression. *Genes Immun* 17: 349-  
583 357.
  - 584 12. Olsson-Alheim, Y. M., M. Salcedo, G. H. Ljunggren, K. Kärre, and L. C. Sentman.  
585 1997. NK cell receptor calibration: effects of MHC class I induction on killing by  
586 Ly49A<sup>high</sup> and Ly49A<sup>low</sup> NK cells. *J Immunol* 159: 3189-3194.
  - 587 13. Salcedo, M., D. A. Diehl, Y. M. Olsson-Alheim, J. Sundbäck, L. Van Kaer, K.  
588 Kärre, and G. H. Ljunggren. 1997. Altered expression of Ly49 inhibitory receptors  
589 on natural killer cells from MHC class I-deficient mice. *J Immunol* 158: 3174-  
590 3180.
  - 591 14. Raulet, H. D., W. Held, I. Correa, J. R. Dorfman, M. Wu, and L. Corral. 1997.  
592 Specificity, tolerance and developmental regulation of natural killer cells defined  
593 by expression of class I-specific Ly49 receptors. *Immunological Reviews* 155: 41-  
594 52.
  - 595 15. Watzl, C., M. Sternberg-Simon, D. Urlaub, and R. Mehr. 2012. Understanding  
596 natural killer cell regulation by mathematical approaches. *Front Immunol* 3: 359.



- 597 16. Forbes, C. A., A. A. Scalzo, M. A. Degli-Esposti, and J. D. Coudert. 2016. Ly49C  
598 Impairs NK Cell Memory in Mouse Cytomegalovirus Infection. *J Immunol* 197:  
599 128-140.
- 600 17. Smith, H. R., H. H. Chuang, L. L. Wang, M. Salcedo, W. J. Heusel, and W. M.  
601 Yokoyama. 2000. Nonstochastic Coexpression of Activating Receptors on  
602 Murine Natural Killer Cells. *J. Exp. Med.* 191: 1341-1354.
- 603 18. Millan, A. J., S. R. Elizaldi, E. M. Lee, J. O. Aceves, D. Muruges, G. G. Loots,  
604 and J. O. Manilay. 2019. Sostdc1 Regulates NK Cell Maturation and Cytotoxicity.  
605 *J Immunol.*
- 606 19. Mair, F., F. J. Hartmann, D. Mrdjen, V. Tosevski, C. Krieg, and B. Becher. 2016.  
607 The end of gating? An introduction to automated analysis of high dimensional  
608 cytometry data. *Eur J Immunol* 46: 34-43.
- 609 20. Van der Maaten, L., and G. Hinton. 2008. Visualizing Data using t-SNE. *Journal*  
610 *of Machine Learning Research* 9: 2579-2605.
- 611 21. Held, W., J. R. Dorfman, M. Wu, and D. H. Raulet. 1996. Major histocompatibility  
612 complex class I- dependent skewing of the natural killer cell Ly49 receptor  
613 repertoire. *Eur. J. Immunol.* 26: 2286-2292.
- 614 22. Hayakawa, Y., and M. J. Smyth. 2006. CD27 dissects mature NK cells into two  
615 subsets with distinct responsiveness and migratory capacity. *J Immunol* 176:  
616 1517-1524.
- 617 23. Kim, S., K. Iizuka, H. S. Kang, A. Dokun, A. R. French, S. Greco, and W. M.  
618 Yokoyama. 2002. In vivo developmental stages in murine natural killer cell  
619 maturation. *Nat Immunol* 3: 523-528.
- 620 24. Pedregosa, F., G. Varoquaux, A. Gramfort, V. Michel, and B. Thirion. 2011.  
621 Scikit-learn: Machine Learning in Python. *Journal of Machine Learning Research*  
622 12.
- 623 25. Zhang, T., S. Liu, P. Yang, C. Han, J. Wang, J. Liu, Y. Han, Y. Yu, and X. Cao.  
624 2009. Fibronectin maintains survival of mouse natural killer (NK) cells via  
625 CD11b/Src/beta-catenin pathway. *Blood* 114: 4081-4088.
- 626 26. Dimasi, N., M. W. Sawicki, L. A. Reineck, Y. Li, K. Natarajan, D. H. Margulies,  
627 and R. A. Mariuzza. 2002. Crystal Structure of the Ly49I Natural Killer Cell  
628 Receptor Reveals Variability in Dimerization Mode Within the Ly49 Family.  
629 *Journal of Molecular Biology* 320: 573-585.
- 630 27. Roth, C., R. J. Carlyle, H. Takizawa, and H. D. Raulet. 2000. Clonal Acquisition  
631 of Inhibitory Ly49 Receptors on Developing NK Cells Is Successively Restricted  
632 and Regulated by Stromal Class I MHC. *Immunity* 13: 143-153.
- 633 28. Fahlen, L., U. Lendahl, and C. L. Sentman. 2001. MHC class I-Ly49 interactions  
634 shape the Ly49 repertoire on murine NK cells. *J Immunol* 166: 6585-6592.
- 635 29. Tripathy, S. K., H. R. Smith, E. A. Holroyd, J. T. Pingel, and W. M. Yokoyama.  
636 2006. Expression of m157, a murine cytomegalovirus-encoded putative major  
637 histocompatibility class I (MHC-I)-like protein, is independent of viral regulation of  
638 host MHC-I. *J Virol* 80: 545-550.
- 639 30. Pegram, H. J., D. M. Andrews, M. J. Smyth, P. K. Darcy, and M. H. Kershaw.  
640 2011. Activating and inhibitory receptors of natural killer cells. *Immunol Cell Biol*  
641 89: 216-224.

- 642 31. Berry, R., N. Ng, P. M. Saunders, J. P. Vivian, J. Lin, F. A. Deuss, A. J. Corbett,  
643 C. A. Forbes, J. M. Widjaja, L. C. Sullivan, A. D. McAlister, M. A. Perugini, M. J.  
644 Call, A. A. Scalzo, M. A. Degli-Esposti, J. D. Coudert, T. Beddoe, A. G. Brooks,  
645 and J. Rossjohn. 2013. Targeting of a natural killer cell receptor family by a viral  
646 immunoevasin. *Nat Immunol* 14: 699-705.
- 647 32. Idris, H. A., H. R. Smith, M. H. L., R. J. Ortaldo, A. A. Scalzo, and W. M.  
648 Yokoyama. 1999. The natural killer gene complex genetic locus Chok encodes  
649 Ly-49D, a target recognition receptor that activates natural killing. *Proceedings of*  
650 *the National Academy of Sciences of the United States of America* 96: 6330-  
651 6335.
- 652 33. Zitvogel, L., E. Maraskovsky, T. Tursz, M. Perricaudet, M. Suter, D. Bellet, P.  
653 Ricciardi-Castagnoli, C. Flament, A. Lozier, and N. C. Fernandez. 1999. Dendritic  
654 cells directly trigger NK cell functions: Cross-talk relevant in innate anti-tumor  
655 immune responses *in vivo*. *Nature Medicine* 5.
- 656 34. Lee, G. A., Y. H. Liou, S. W. Wang, K. L. Ko, S. T. Jiang, and N. S. Liao. 2011.  
657 Different NK cell developmental events require different levels of IL-15 trans-  
658 presentation. *J Immunol* 187: 1212-1221.
- 659 35. Dogra, P., C. Rancan, W. Ma, M. Toth, T. Senda, D. J. Carpenter, M. Kubota, R.  
660 Matsumoto, P. Thapa, P. A. Szabo, M. M. Li Poon, J. Li, J. Arakawa-Hoyt, Y.  
661 Shen, L. Fong, L. L. Lanier, and D. L. Farber. 2020. Tissue Determinants of  
662 Human NK Cell Development, Function, and Residence. *Cell* 180: 749-763 e713.
- 663 36. Orr, M. T., W. J. Murphy, and L. L. Lanier. 2010. 'Unlicensed' natural killer cells  
664 dominate the response to cytomegalovirus infection. *Nat Immunol* 11: 321-327.  
665

666 **Footnotes**

667

668 <sup>1</sup> This work was supported by University of California (UC) Merced faculty research  
669 funding and UC graduate student fellowships (to A.J.M.).

670

671 Abbreviations: b2m: beta-2-microglobulin; C: cluster; iNK: immature NK; Lin: Lineage;  
672 MHC-I: MHC class I; mNK: most mature NK; PCA: principal component analysis; tNK:  
673 transitional NK; tSNE: t-stochastic neighbor embedding

674

## 675 Figure Legends

676

677 **Figure 1. Identification of NK cell cluster phenotypic heterogeneity in B6 mice.** (A)  
678 Frequencies of Ly49I, Ly49G2, Ly49H, and Ly49D receptors on Lin<sup>-</sup> (negative for CD3,  
679 CD4, CD8, CD19, Gr1, and Ter119), NK1.1<sup>+</sup> gated cells. Asterisks indicate statistically  
680 significant differences between means as determined by the Student's *t*-test. \*\*\*\**p* <  
681 0.0001 ; (B) Representative flow cytometry histogram plots of Ly49 receptor expression  
682 shown in A; (C) Table of NK cell clusters defined by expression of Ly49 receptors, ordered  
683 from most activating (C1) to most inhibitory (C16) based on the number of activating or  
684 inhibitory receptors expressed; (D) tSNE color mapping plots in red for clusters with Ly49I,  
685 Ly49G2, Ly49H, and Ly49D receptor expression; (E) Manual gating of 16 NK cell Ly49  
686 clusters gated on live, Lin<sup>-</sup>NK1.1<sup>+</sup> cells; (F) Representative unbiased clustering of the 16  
687 clusters visualized by tSNE; (G) Frequencies of each cluster in the Lin<sup>-</sup> NK1.1<sup>+</sup> population.  
688 Each point of the graph represents an individual mouse of two separate experiments.

689

690 **Figure 2. Higher interdependence of NK cell Ly49 cluster frequencies at the iNK**  
691 **stage.** (A) Example of the product rule calculations of independent probability for NK cells  
692 that express Ly49H and Ly49D (H,D) out of three receptors observed. (B) Summary  
693 graph of experimental (observed) cluster frequencies and cluster frequencies predicted  
694 by the product rule (predicted); (C) Graph of NK cell log<sub>2</sub>(observed/predicted) error  
695 grouped by activating Ly49 receptors; (D) Representative flow cytometry plot of CD27  
696 and CD11b staining to distinguish stages of NK cell maturation; (E) Total error was  
697 calculated by the sum of the absolute values of log<sub>2</sub>(observed/predicted) from all clusters  
698 found at each NK maturation stage determined by the product rule and observed  
699 frequencies (iNK, white bars, tNK, gray bars and mNK, black bars); (F-G) Total product  
700 rule for NK cells organized by expression of (F) activating receptors or (G) inhibitory  
701 receptors; (H-J) Log<sub>2</sub>(observed/predicted) error plots for each cluster found in (H) iNK, (I)  
702 tNK, and (J) mNK cell stages of maturation. Positive error values indicate  
703 underestimation while negative values indicate overestimation. Each point on the graph  
704 represents an individual mouse. Asterisks indicate statistically significant differences  
705 between means as determined by the Student *t* test. \*\**p* < 0.01, \*\*\**p* < 0.001, \*\*\*\**p* <  
706 0.0001.

707

708 **Figure 3. Certain NK clusters predominate at each stage of NK cell maturation.** (A)  
709 Map of cluster location via tSNE plot; (B-D) Representative tSNE plots of (B) iNK, (C)  
710 tNK, and (D) mNK cells visualized by density; (E) Summary graph of Ly49I, Ly49G2,  
711 Ly49H, and Ly49D receptor frequencies gated on iNK (white bars), tNK (gray bars), or  
712 mNK cells (black bars); (F) Summary graph of each NK cell maturation stage expressing  
713 0, 1, 2, 3, or 4 Ly49 receptors; (G) PCA plots were generated from 4 biological replicates  
714 of average percentage for clusters with respect to NK cell maturation stage; (H-J)  
715 Summary graph of each calculated cluster percentage for each cluster at (H) iNK, (I) tNK,  
716 (J) and mNK cell stage. Each point of the graph represents an individual mouse. Asterisks  
717 indicate statistically significant differences between means as determined by the Student  
718 *t* test. \**p* < 0.05.

719

720 **Figure 4. Evidence for prescribed pathways of NK cell cluster differentiation in vitro**  
721 **and in vivo.** (A) Scheme of experimental design for sorting clusters and in vitro culture;  
722 (B-C) Representative Ly49I vs. Ly49G2 flow cytometry plots of sorted clusters showing  
723 post-sort purity on Day 0 (top row) and 4-days after culture (bottom row) of gated NK1.1+  
724 cells; (B) Differentiation of clusters predominantly found at the iNK stage, (C)  
725 differentiation of clusters predominantly found at the tNK stages: (D) Summary graph of  
726 cluster Ly49I receptor expression after Day 4 of culture, calculated by subtracting Day 4  
727 Ly49I frequency from Day 0 Ly49I frequency; (E) Scheme of experimental design of in  
728 vivo adoptive transfer of selected NK clusters; (F-H) Representative Ly49I vs. Ly49G2  
729 flow cytometry plots of sorted clusters for post-sort purity of gated NK cells on Day 0 (top  
730 row) and Day 4 after adoptive transfer into recipient mice (bottom row); (F) In vivo  
731 differentiation of clusters predominantly found at the iNK stage; (G) In vivo differentiation  
732 of clusters predominantly found at the tNK stage, and (H) in vivo differentiation of C14,  
733 found predominantly in mNK; (I) Summary graph of cluster Ly49I receptor expression 4  
734 days after adoptive transfer, calculated as in D. Each point of the graph represents an  
735 experimental replicate; (J) Schematic summary of prescribed pathways from iNK-  
736 predominant clusters; (K) Summary of prescribed pathways from tNK-predominant  
737 clusters.

738  
739 **Figure 5. Immature NK cells display in vitro characteristics of proliferation,**  
740 **regardless of cluster type.** (A) Scheme of experimental design to sort and culture iNK  
741 (CD27<sup>+</sup>CD11b<sup>-</sup>), tNK (CD27<sup>+</sup>CD11b<sup>+</sup>), and mNK (CD27<sup>-</sup>CD11b<sup>+</sup>) cells; (B-E) NK cell  
742 proliferation as determined by flow cytometry and calculating the fold change in cellularity  
743 between Day 2 and Day 6 of culture (e.g. # of cells at Day 6 divided by # of cells at Day  
744 2) for (B) overall cell proliferation, proliferation in cultures initiated with sorted (C) iNKs,  
745 (D) tNKs, and (E) mNKs, further categorized into predominant iNK, tNK, and mNK clusters  
746 (n=3 experimental replicates; (F) Fold change in proliferation for clusters that originated  
747 from sorted iNK cells; (G) Intracellular Ki-67 expression of Lin<sup>-</sup> NK1.1<sup>+</sup> CD27<sup>+</sup> (iNK and  
748 tNK stages) and Lin<sup>-</sup> NK1.1<sup>+</sup> CD27<sup>-</sup> (mNK stage) cells post-culture (n=2 female mice  
749 (triangles; 24 weeks old), n=2 male mice (circles; 19 weeks old); (H) Summary plots of  
750 Ki-67 expression between CD27<sup>+</sup> or CD27<sup>-</sup> NK cells: (I) Ki-67 expression on CD27<sup>+</sup> and  
751 CD27<sup>-</sup> NK cells disaggregated by Ly49 receptor type, and (J) Ki-67 expression on NK  
752 cells disaggregated by cluster type. Asterisks indicate statistically significant differences  
753 between means as determined by the Student's *t* test. \**p* < 0.05, \*\**p* < 0.01, \*\*\*\**p* <  
754 0.0001.

755  
756 **Figure 6. Altered NK cell cluster distribution in MHC-I<sup>-/-</sup> mice.** (A) Summary graph of  
757 Ly49I, Ly49G2, Ly49H, and Ly49D frequencies gated on NK1.1<sup>+</sup> cells in  $\beta_2m^{-/-}$  (MHC-I<sup>-/-</sup>)  
758 and B6 (MHC-I<sup>+/+</sup>) spleens; (B) Graph of frequencies of iNK (CD27<sup>+</sup>CD11b<sup>-</sup>), tNK  
759 (CD27<sup>+</sup>CD11b<sup>+</sup>), and mNK (CD27<sup>-</sup>CD11b<sup>+</sup>) cells; (C,E) Representative plots of Lin<sup>-</sup>  
760 NK1.1<sup>+</sup> cells examining (C) Ly49I and Ly49G2 and (E) Ly49H and Ly49D in MHC-I<sup>+/+</sup> (left)  
761 and MHC-I<sup>-/-</sup> mice; (D,F) Summary plots for data shown C and E; (G) Graphs gated on  
762 parent iNK, tNK or mNK gate for Ly49I and Ly49G2; (H) Graph gated on parent iNK, tNK  
763 or mNK gate for Ly49H and Ly49D; (I) Log<sub>2</sub>(observed/expected) values for MHC-I<sup>-/-</sup> and  
764 MHC-I<sup>+/+</sup> NK cell clusters; (J) Graph of NK cell cluster frequencies in MHC-I<sup>+/+</sup> and MHC-  
765 I<sup>-/-</sup> mice; (K-N) Working model illustrating MHC-I's influence on NK cell pathways for

766 clusters expressing only inhibitory receptors (**K-L**) or activating receptors (**M-N**); (**K and**  
767 **M**) model of cluster pathways in MHC-I<sup>+/+</sup> mice; (**L and N**) model of cluster pathways in  
768 MHC-I<sup>-/-</sup> mice. Each point of the graph represents an individual mouse. Asterisks indicate  
769 statistically significant differences between means as determined by the Student *t* test. \**p*  
770 < 0.05, \*\**p* < 0.01, \*\*\**p* < 0.001, \*\*\*\**p* < 0.0001.

# Millan et al. 2020. Figure 1

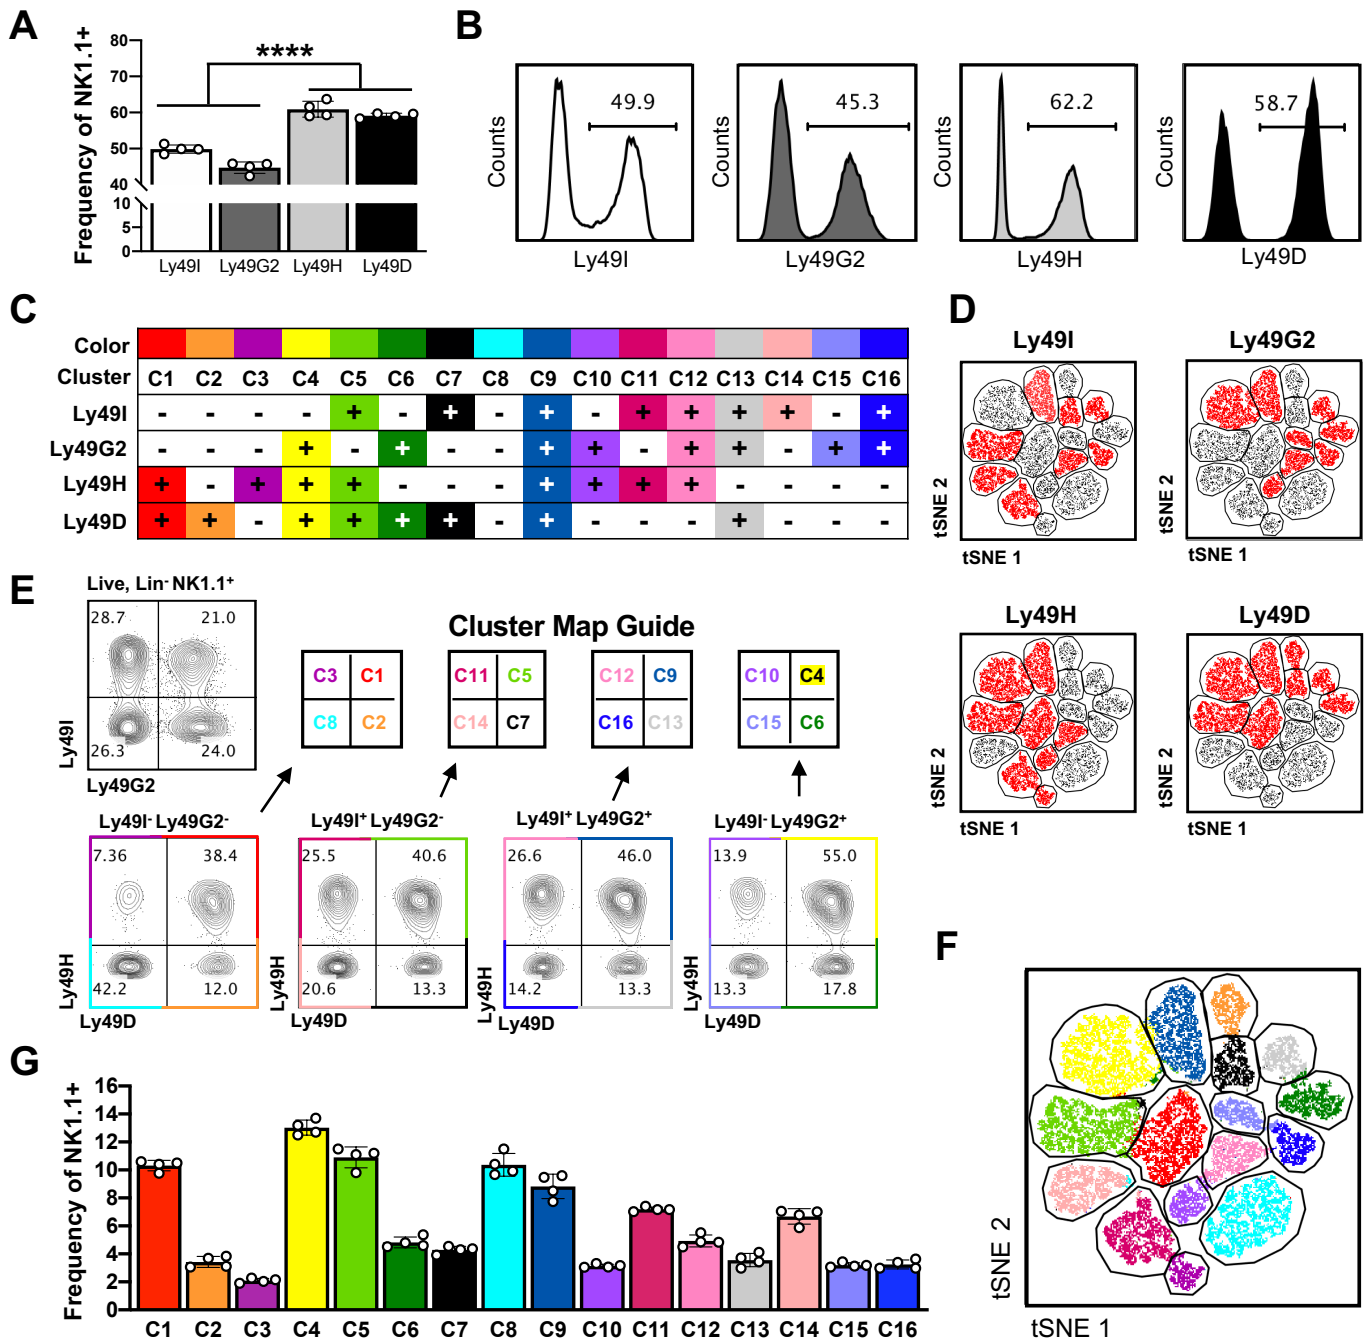

## Millan et al. 2020. Figure 2

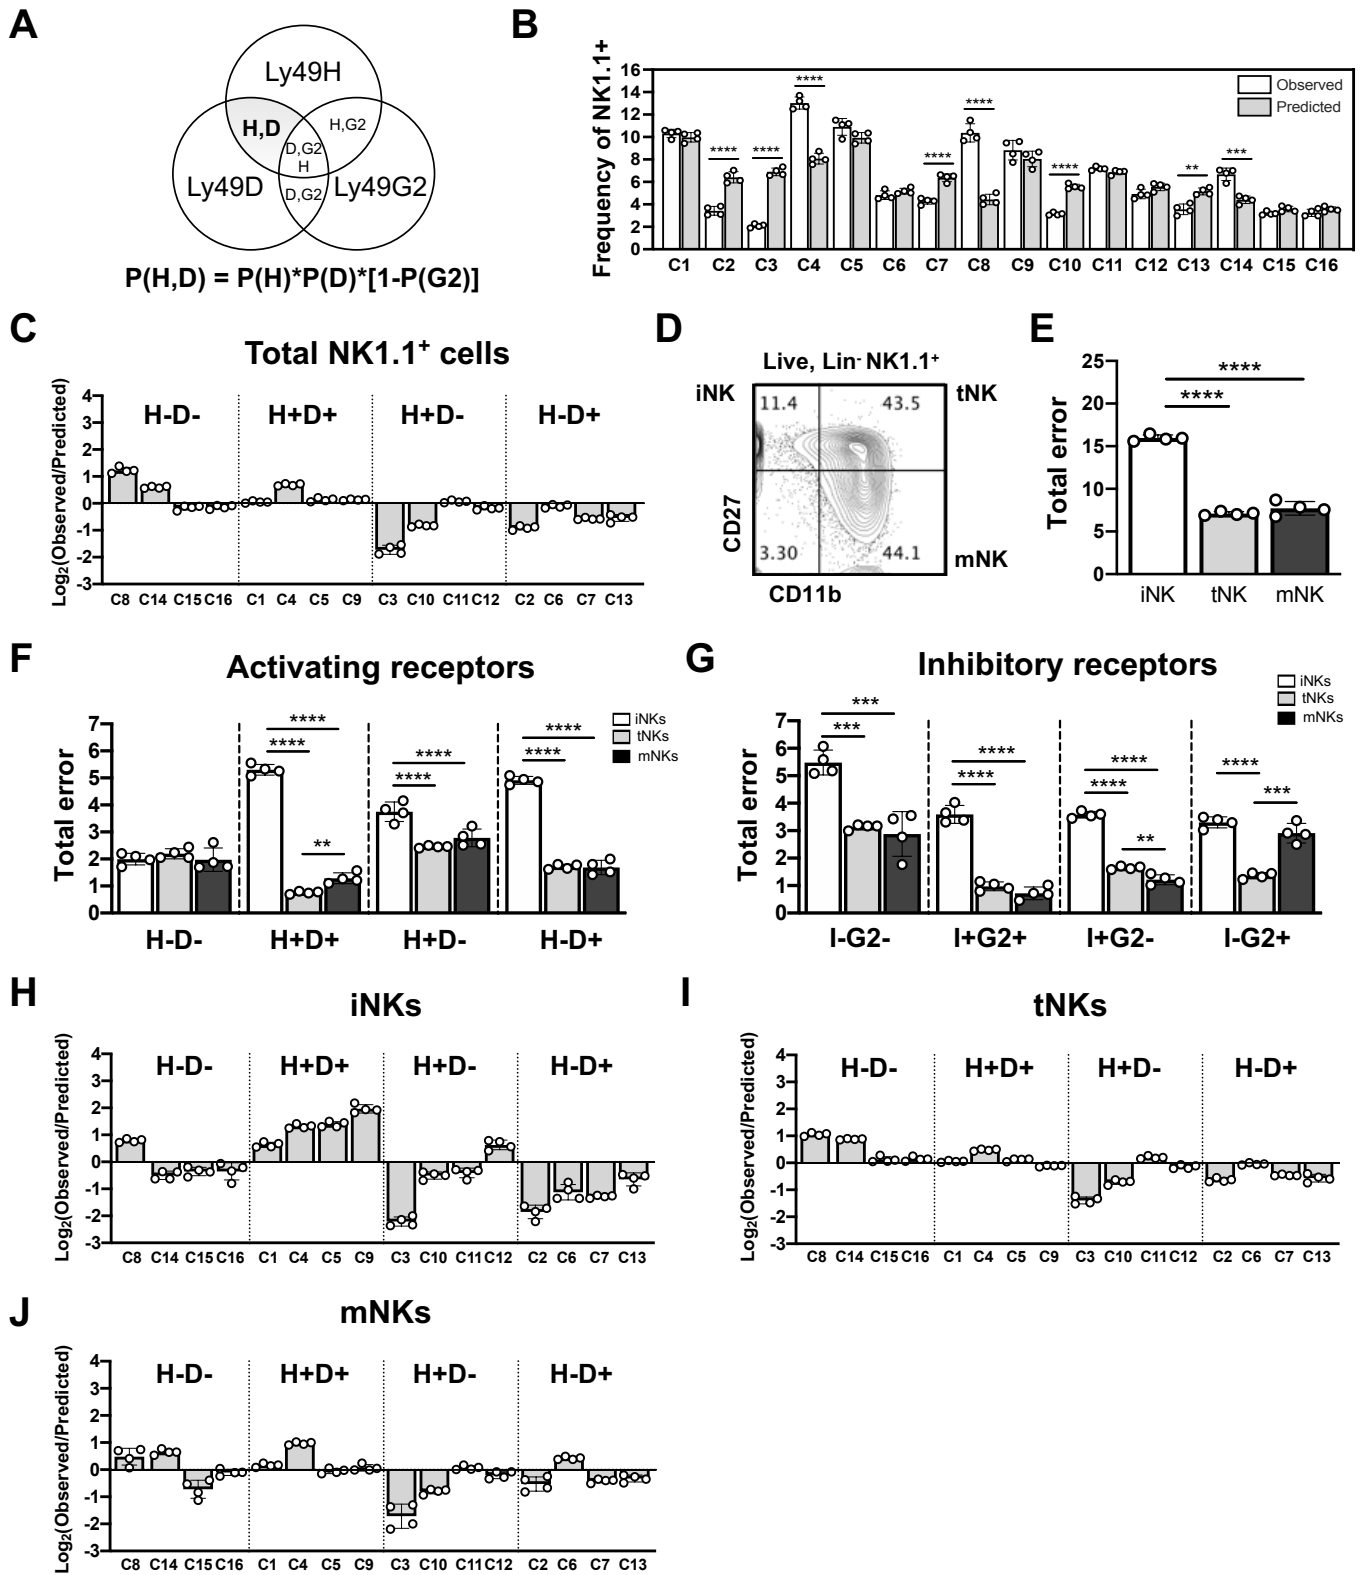



## Millan et al. 2020. Figure 3

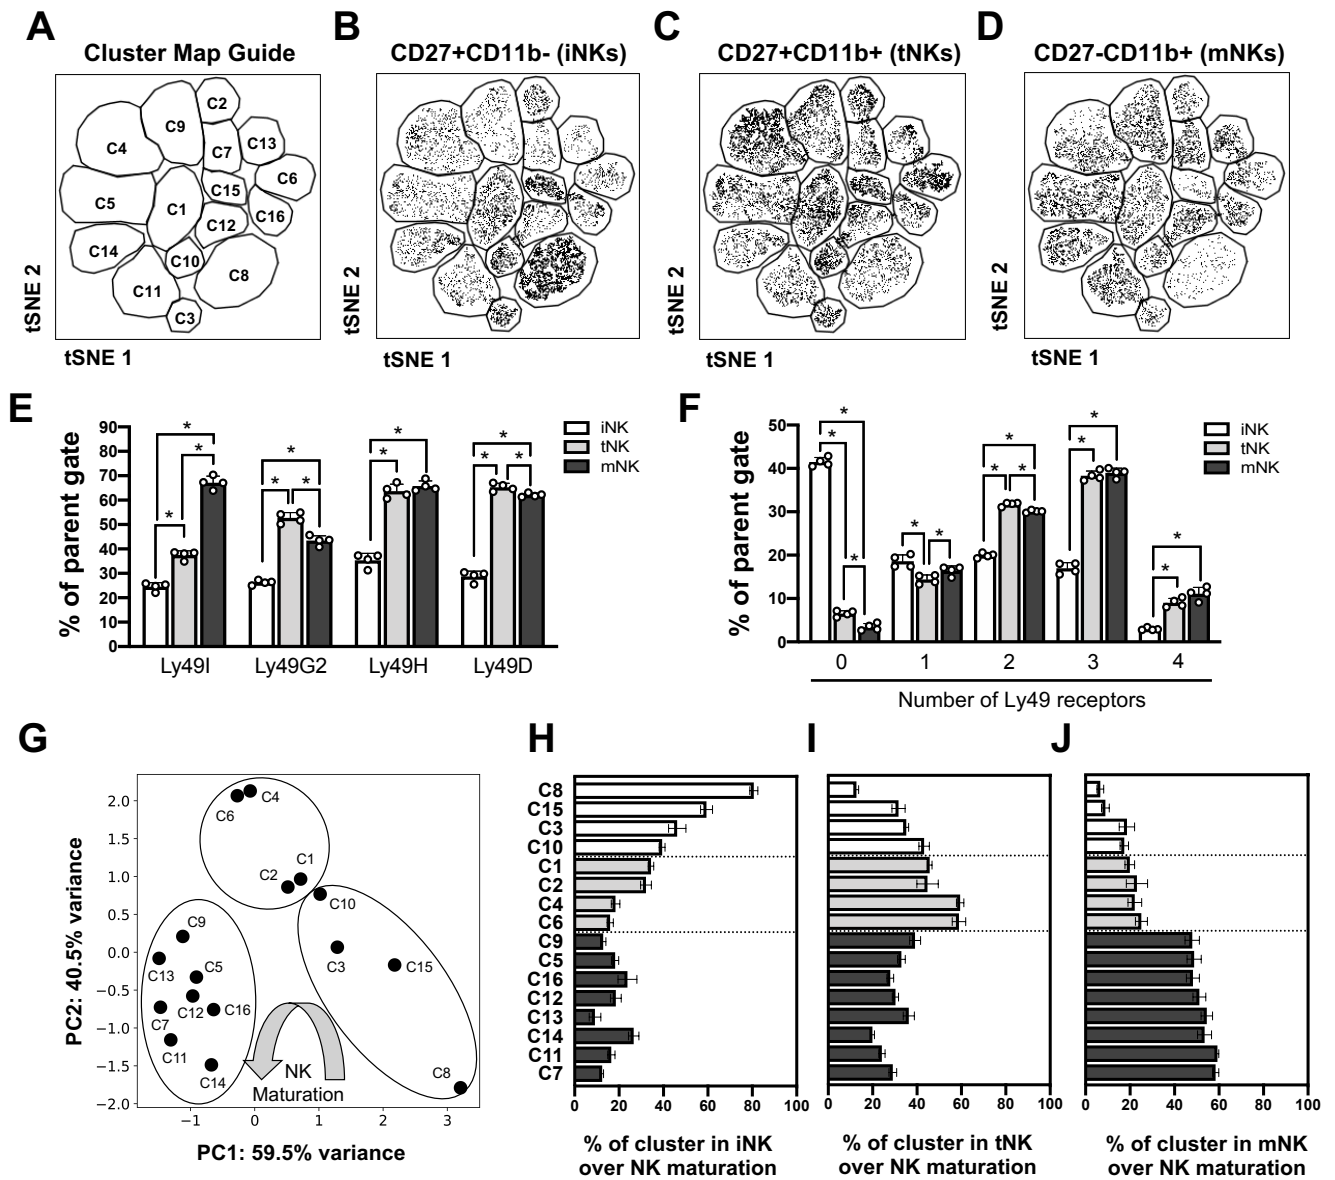

# Millan et al. 2020. Figure 4

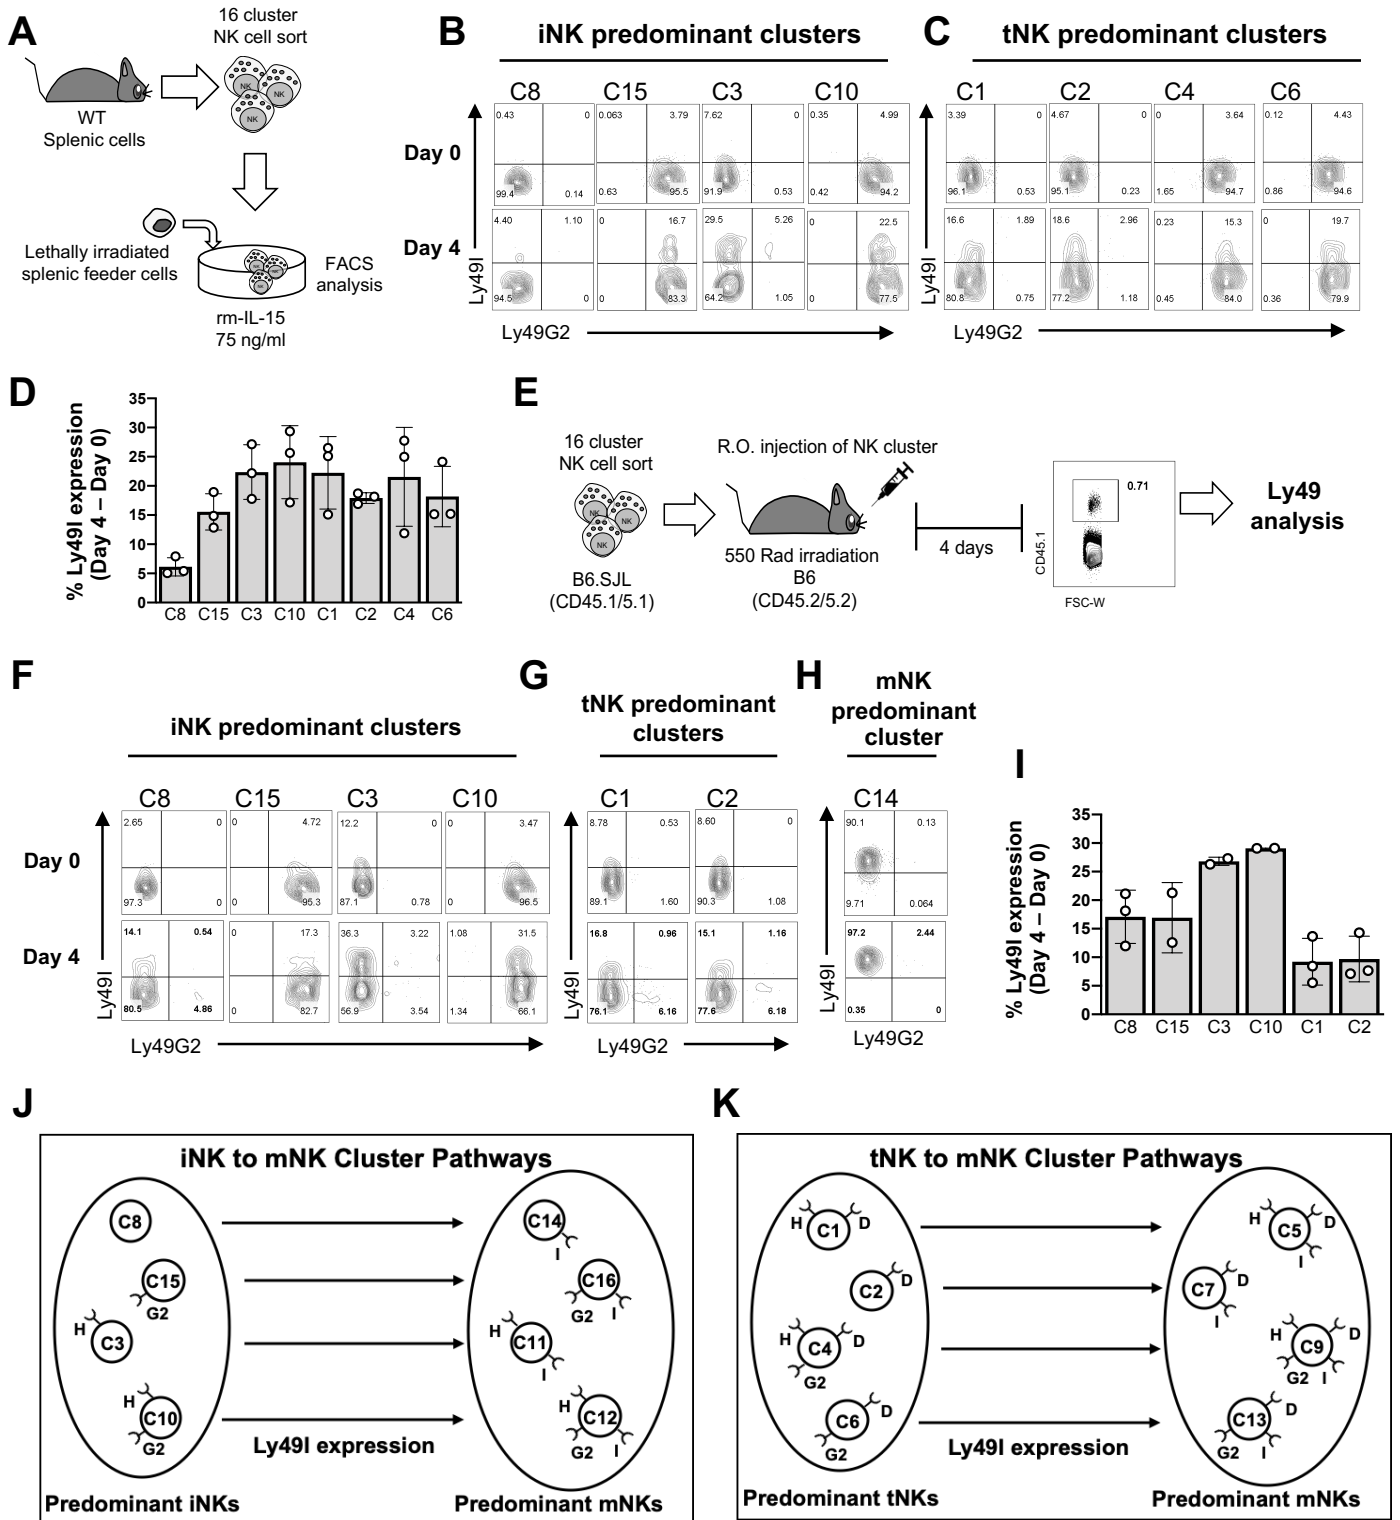

## Millan et al. 2020. Figure 5

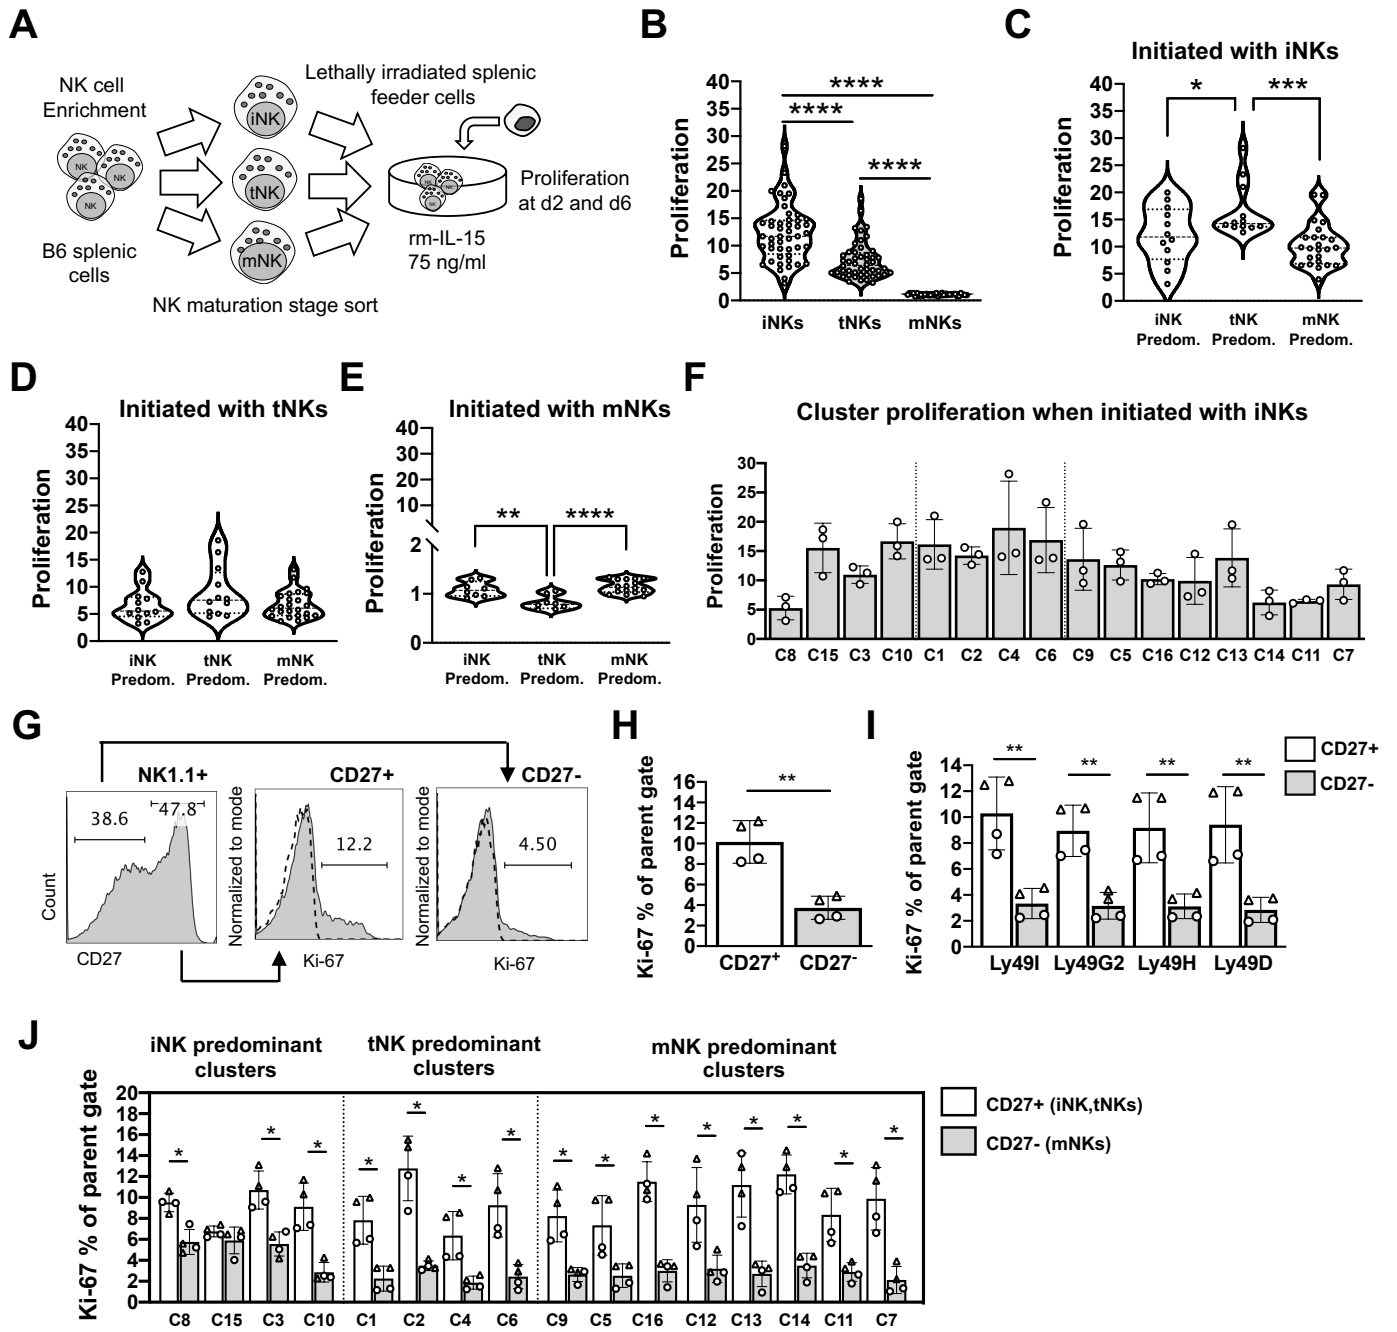

# Millan et al. 2020. Figure 6

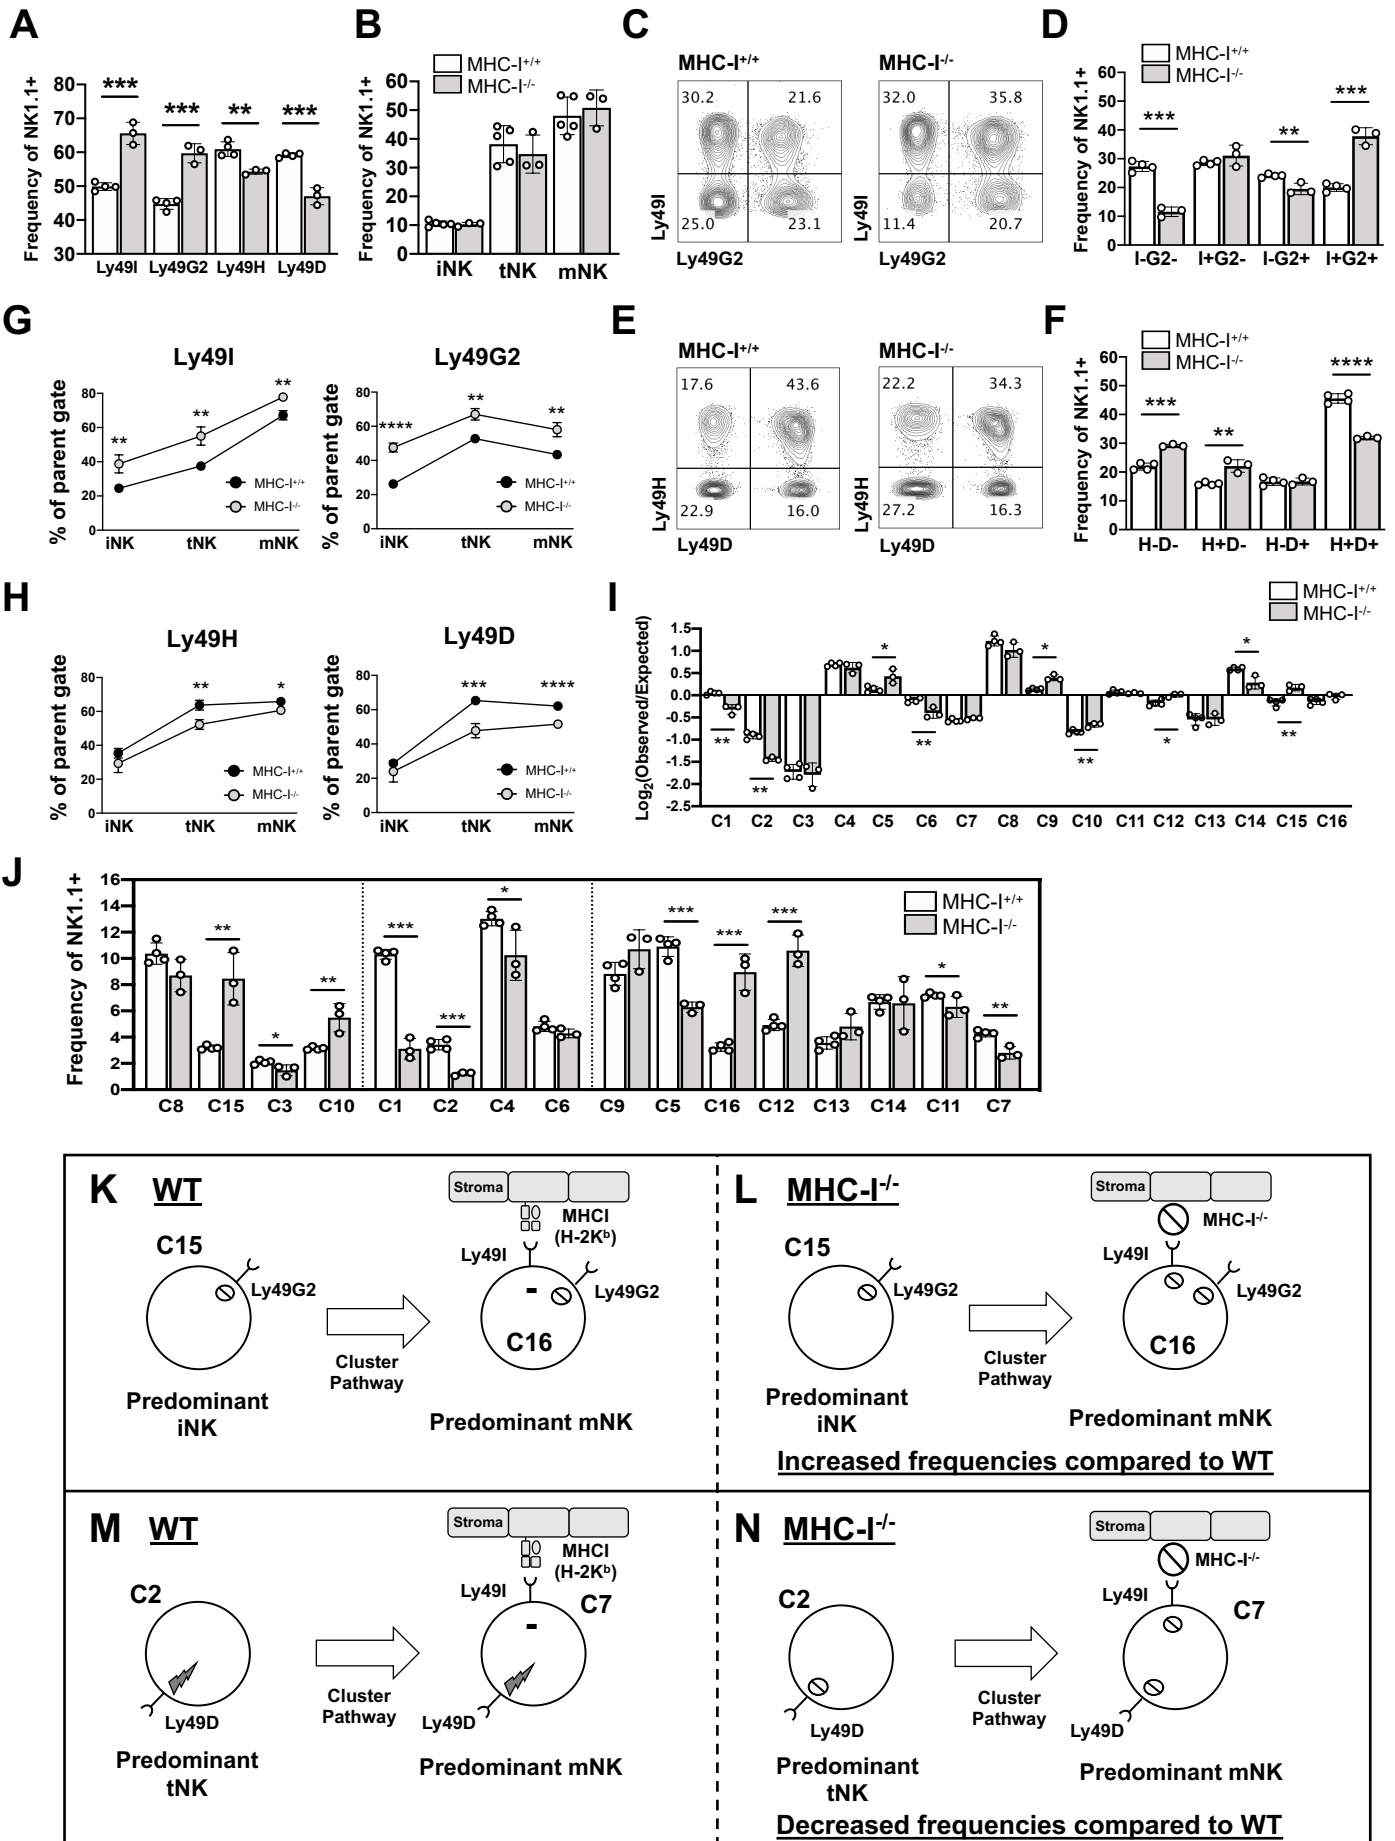

Source: https://www.biorxiv.org/content/10.1101/2020.05.23.112391v1.full.pdf
